# Supplementary material for: Epidemiology of 7375 children and adolescents hospitalized with COVID-19 in Germany, reported via a prospective, nationwide surveillance study in 2020–2022
Source: PubMed Central journal article supplement (PMC10762173; doi:10.1038/s41598-023-49210-1), 2024-01-02
Supplement: 41598_2023_49210_MOESM1_ESM.pdf [file 41598_2023_49210_MOESM1_ESM.pdf]

## Supplement (eTable 1-4, eFigure 1)

### Epidemiology of 7,375 children and adolescents hospitalized with COVID-19 in Germany, reported via a prospective, nationwide surveillance study in 2020-2022

Maren Doenhardt<sup>1#§</sup>, Markus Hufnagel<sup>2#</sup>, Natalie Diffloth<sup>1</sup>, Johannes Hübner<sup>3</sup>, René Mauer<sup>4</sup>, Dominik T. Schneider<sup>5</sup>, Arne Simon<sup>6</sup>, Tobias Tenenbaum<sup>7</sup>, Andreas Trotter<sup>8</sup>, Jakob Armann<sup>1</sup>, Reinhard Berner<sup>1</sup>, the DGPI COVID-19 Working Group\*

<sup>1</sup> Department of Pediatrics, University Hospital and Medical Faculty Carl Gustav Carus, Technische Universität Dresden, Dresden, Germany

<sup>2</sup> Division of Pediatric Infectious Diseases and Rheumatology, Department of Pediatrics and Adolescent Medicine, University Medical Center, Medical Faculty, University of Freiburg, Freiburg, Germany

<sup>3</sup> Division of Pediatric Infectious Diseases, Hauner Children's Hospital, Ludwig-Maximilians- Universität München, Munich, Germany

<sup>4</sup> Institute for Medical Informatics and Biometry, Medical Faculty Carl Gustav Carus, Technische Universität Dresden, Dresden, Germany

<sup>5</sup> Clinic of Pediatrics, Municipal Hospital Dortmund, University Witten/Herdecke, Germany

<sup>6</sup> Pediatric Oncology and Hematology, Children's Hospital Medical Center, University Clinics, Saarland, Germany

<sup>7</sup> Clinic for Child and Adolescent Medicine, Sana Klinikum Lichtenberg, Academic Teaching Hospital, Charité-Universitätsmedizin Berlin, Berlin, Germany

<sup>8</sup> Children's Hospital and Center for Perinatal Medicine, Teaching Hospital of the University of Freiburg, Singen, Germany

# Shared first authorship, § corresponding author

\*The DGPI COVID-19 working group (all names of reporting physicians and their affiliations at the end of manuscript)

**eTable 1: Comparison of COVID-19 patients treated with antiviral therapy (n=78, 1.1% of all hospitalized patients) vs. patients without antiviral therapy**

|                                  | Patients with antiviral treatment<br>(N=78) |      | Patients without antiviral treatment<br>(N=7,297) |      | P-value<br>Chi-Square-Test<br>(95% CI) |
|----------------------------------|---------------------------------------------|------|---------------------------------------------------|------|----------------------------------------|
|                                  | N                                           | %    | N                                                 | %    |                                        |
| Age: <1y                         | 4                                           | 5.0  | 3,089                                             | 42.3 | 0.001 (0.0-0.2)                        |
| Age: 1-4y                        | 13                                          | 16.3 | 1,659                                             | 22.7 | 0.2 (0.4-1.2)                          |
| Age: 5-11y                       | 24                                          | 30.0 | 1,264                                             | 17.3 | 0.007 (1.3-3.3)                        |
| Age: 12-17y                      | 35                                          | 43.8 | 1,263                                             | 17.3 | 0.0001 (2.4-5.6)                       |
| Age: >17y                        | 4                                           | 5.0  | 20                                                | 0.3  | 0.0001 (6.4-40.5)                      |
| Sex: Female                      | 37                                          | 46.3 | 3,375                                             | 46.3 | 1 (0.6-1.5)                            |
| Comorbidity                      | 65                                          | 81.3 | 1,928                                             | 26.4 | 0.0001 (6.7-20.5)                      |
| Respiratory                      | 17                                          | 21.3 | 286                                               | 3.9  | 0.0001 (3.7-10.6)                      |
| Cardiovascular                   | 17                                          | 21.3 | 256                                               | 3.5  | 0.0001 (4.2-11.8)                      |
| Gastrointestinal                 | 6                                           | 7.5  | 197                                               | 2.7  | 0.01 (1.3-6.5)                         |
| Hepatic                          | 4                                           | 5.0  | 62                                                | 0.8  | 0.0001 (2.2-15.5)                      |
| Renal                            | 11                                          | 13.8 | 147                                               | 2.0  | 0.0001 (3.9-13.5)                      |
| Neurological / neuromuscular     | 28                                          | 35.0 | 434                                               | 5.9  | 0.0001 (5.1-12.6)                      |
| Psychiatric                      | 2                                           | 2.5  | 112                                               | 1.5  | 0.5 (0.4-6.6)                          |
| Hematological                    | 9                                           | 11.3 | 151                                               | 2.1  | 0.0001 (2.9-11.2))                     |
| Oncological                      | 11                                          | 13.8 | 102                                               | 1.4  | 0.0001 (5.6-18.8)                      |
| s/p transplantation              | 8                                           | 10.0 | 32                                                | 0.4  | 0.0001 (10.5-39.5)                     |
| Autoimmune                       | 7                                           | 8.8  | 135                                               | 1.9  | 0.0001 (2.3-10.4)                      |
| Primary immunodeficiency         | 7                                           | 8.8  | 22                                                | 0.3  | 0.0001 (12.3-48.2)                     |
| Tracheostomy                     | 1                                           | 1.3  | 18                                                | 0.2  | 0.09 (0.7-33.4)                        |
| Immunosuppressive therapy        | 25                                          | 31.3 | 128                                               | 1.8  | 0.0001 (13.8-33.5)                     |
| Home oxygen therapy              | 8                                           | 10.0 | 105                                               | 1.4  | 0.0001 (3.5-14.5)                      |
| h/o prematurity                  | 7                                           | 8.8  | 371                                               | 5.1  | 0.1 (0.8-3.8)                          |
| Obesity                          | 15                                          | 18.8 | 580                                               | 8.0  | 0.0004 (1.5-4.6)                       |
| Trisomy 21                       | 4                                           | 5.0  | 44                                                | 0.6  | 0.0001 (3.1-21.1)                      |
| Other genetic syndromes          | 12                                          | 15.0 | 156                                               | 2.1  | 0.0001 (4.2-13.7)                      |
| Admission to intensive care unit | 45                                          | 56.3 | 178                                               | 2.4  | 0.0001 (27.1-62.8)                     |
| Remdesevir                       | 41                                          | 51.3 | 0                                                 | 0    | n.a.                                   |
| Nirmatrelvir/Ritonavir           | 2                                           | 2.5  | 0                                                 | 0    | n.a.                                   |
| Sotrovimab                       | 20                                          | 25.0 | 0                                                 | 0    | n.a.                                   |
| Tixagevimab/Cilgavimab           | 3                                           | 3.8  | 0                                                 | 0    | n.a.                                   |
| Casirivimab/Imdevimab            | 7                                           | 8.8  | 0                                                 | 0    | n.a.                                   |
| Ribavirin                        | 2                                           | 2.5  | 0                                                 | 0    | n.a.                                   |
| Bamlanivimab                     | 2                                           | 2.5  | 0                                                 | 0    | n.a.                                   |

n.a., not applicable

**eTable 2. Risk factors for ICU admission analyzed via a fully adjusted Poisson regression model. Only symptomatic patients were included (N=6,512 out of 7,375 total).**

|                              | All     |      | General pediatric ward |      | Intensive care unit |      | Poisson regression |               |         |
|------------------------------|---------|------|------------------------|------|---------------------|------|--------------------|---------------|---------|
|                              | N=6,512 |      | N=6,290                |      | N=222               |      | RR                 | CI            | p-value |
|                              | N       | %    | N                      | %    | N                   | %    |                    |               |         |
| Age: <>1y (reference)        | 2,879   | 44.2 | 2,837                  | 45.1 | 42                  | 18.9 |                    |               |         |
| Age: 1-4y                    | 1,467   | 22.5 | 1,418                  | 22.5 | 49                  | 22.1 | 1.56               | (1.16 – 1.96) | 0.03    |
| Age: 5-11y                   | 1,061   | 16.3 | 1,006                  | 16.0 | 55                  | 24.8 | 1.43               | (1.05 – 1.81) | 0.1     |
| Age: 12-17y                  | 1,084   | 16.6 | 1,011                  | 16.1 | 73                  | 32.9 | 2.00               | (1.61 – 2.38) | <0.001  |
| Age: > 17y*                  | 21      | 0.3  | 18                     | 0.3  | 3                   | 1.4  |                    |               |         |
| Sex: Female (reference male) | 3,011   | 46.2 | 2,905                  | 46.2 | 106                 | 47.7 | 1.05               | (0.80 – 1.30) | 0.7     |
| Comorbidity                  | 1,679   | 25.8 | 1,524                  | 24.2 | 155                 | 69.8 | 1.72               | (1.34 – 2.11) | 0.006   |
| Respiratory                  | 276     | 4.2  | 238                    | 3.8  | 38                  | 17.1 | 1.11               | (0.70 – 1.52) | 0.6     |
| Cardiovascular               | 244     | 3.7  | 215                    | 3.4  | 29                  | 13.1 | 1.13               | (0.70 – 1.56) | 0.6     |
| Gastrointestinal             | 160     | 2.5  | 151                    | 2.4  | 9                   | 4.1  | 1.06               | (0.62 – 1.50) | 0.8     |
| Hepatic                      | 47      | 0.7  | 38                     | 0.6  | 9                   | 4.1  | 1.34               | (0.70 – 1.98) | 0.4     |
| Renal                        | 121     | 1.9  | 109                    | 1.7  | 12                  | 5.4  | 0.69               | (0.07 – 1.30) | 0.2     |
| Neurological / neuromuscular | 393     | 1.3  | 317                    | 5.0  | 76                  | 34.2 | 1.79               | (1.46 – 2.13) | <0.001  |
| Psychiatric*                 | 84      | 1.3  | 80                     | 1.3  | 4                   | 1.8  |                    |               |         |
| Hematological                | 136     | 2.1  | 119                    | 1.9  | 17                  | 7.7  | 1.39               | (0.88 – 1.89) | 0.2     |
| Oncological                  | 85      | 1.3  | 76                     | 1.2  | 9                   | 4.1  | 1.10               | (0.69 – 2.04) | 0.4     |
| s/p transplantation*         | 30      | 0.5  | 27                     | 0.4  | 3                   | 1.4  |                    |               |         |
| Autoimmune                   | 117     | 1.8  | 104                    | 1.7  | 13                  | 5.9  | 1.10               | (0.47 – 1.74) | 0.8     |
| Primary immunodeficiency     | 26      | 0.4  | 18                     | 0.3  | 8                   | 3.6  | 1.91               | (1.23 – 2.60) | 0.1     |
| Tracheostomy                 | 17      | 0.3  | 8                      | 0.1  | 9                   | 4.1  | 1.53               | (0.91 – 2.16) | 0.2     |
| Immunosuppressive therapy    | 124     | 1.9  | 112                    | 1.8  | 12                  | 5.4  | 1.17               | (0.53 – 1.80) | 0.6     |
| Home oxygen therapy          | 105     | 1.6  | 71                     | 1.1  | 34                  | 15.3 | 2.24               | (1.68 – 2.80) | 0.005   |
| History of prematurity       | 332     | 5.1  | 309                    | 4.9  | 23                  | 10.4 | 1.66               | (1.18 – 2.13) | 0.04    |
| Obesity                      | 529     | 8.1  | 487                    | 7.7  | 42                  | 18.9 | 1.60               | (1.24 – 1.96) | 0.01    |
| Trisomy 21                   | 45      | 0.7  | 32                     | 0.5  | 13                  | 5.9  | 2.66               | (1.96 – 3.36) | 0.006   |
| Other genetic syndromes      | 147     | 2.3  | 116                    | 1.8  | 31                  | 14.0 | 1.62               | (1.23 – 2.02) | 0.02    |
| Coinfection                  | 559     | 8.6  | 497                    | 7.9  | 62                  | 27.9 | 2.55               | (2.25 – 2.84) | <0.001  |

\*not included in Poisson regression model due to low number of ICU cases (n<6)

**eTable 3: Patients with coinfections (n=674, 9.2% of all hospitalized patients), compared by coinfection type and by admission to general pediatric wards vs. intensive care unit**

|                                             | All<br>N=7,375     |            | General Pediatric<br>ward<br>N=7,152 |            | Intensive Care Unit<br>N=223 |             | P-value*<br>(95%-CI)    |
|---------------------------------------------|--------------------|------------|--------------------------------------|------------|------------------------------|-------------|-------------------------|
|                                             | n/N                | %          | n/N                                  | %          | n/N                          | %           |                         |
| <b>All coinfections</b>                     | <b>674 / 7,375</b> | <b>9.1</b> | <b>611 / 7,152</b>                   | <b>8.5</b> | <b>63 / 223</b>              | <b>28.3</b> | <b>0.0001 (3.0-5.2)</b> |
| <b>Age, median (IQR)</b>                    | <b>1 (0-7)</b>     |            | <b>1 (0-7)</b>                       |            | <b>6 (1-11)</b>              |             | <b>0.0001 (n.a.)</b>    |
| <b>Viral airway<br/>coinfection</b>         | <b>146 / 7,375</b> | <b>2.0</b> | <b>131 / 7,152</b>                   | <b>1.8</b> | <b>15 / 223</b>              | <b>6.7</b>  | <b>0.0001 (2.2-5.9)</b> |
| <b>Age, median (IQR)</b>                    | <b>1 (0-2)</b>     |            | <b>0 (0-2)</b>                       |            | <b>2 (0.5-4.5)</b>           |             | <b>0.02 (n.a.)</b>      |
| Respiratory Syncytial<br>Virus (RSV)        | 57 / 146           | 39.0       | 52 / 131                             | 39.7       | 5 / 15                       | 33.3        | 0.6<br>(0.3-2.2)        |
| Influenza                                   | 7 / 146            | 4.8        | 7 / 131                              | 5.3        | 0 / 15                       | 0           | 0.4<br>(n.a.)           |
| Human<br>Metapneumovirus<br>(HMPV)          | 10 / 146           | 6.8        | 7 / 131                              | 5.3        | 3 / 15                       | 20.0        | 0.04 (1.1-10.1)         |
| Human Rhinovirus (HRV)                      | 37 / 146           | 25.3       | 33 / 131                             | 5.3        | 4 / 15                       | 26.7        | 0.9 (0.4-3.2)           |
| Adenovirus                                  | 16 / 146           | 11.0       | 16 / 131                             | 12.2       | 0 / 15                       | 0           | 0.2 (n.a.)              |
| Bocavirus                                   | 12 / 146           | 8.2        | 12 / 131                             | 9.2        | 0 / 15                       | 0           | 0.2 (n.a.)              |
| Enterovirus                                 | 21 / 146           | 14.4       | 20 / 131                             | 15.3       | 1 / 15                       | 6.7         | 0.4 (0.1-3.1)           |
| Parainfluenzavirus                          | 7 / 146            | 4.8        | 6 / 131                              | 4.6        | 1 / 15                       | 6.7         | 0.7 (1.0-3.2)           |
| <b>Bacterial airway<br/>coinfection</b>     | <b>83 / 7,375</b>  | <b>1.1</b> | <b>53 / 7,152</b>                    | <b>0.7</b> | <b>30 / 223</b>              | <b>13.5</b> | <b>0.0001 (1.9-4.2)</b> |
| <b>Age, median (IQR)</b>                    | <b>4 (1-14)</b>    |            | <b>3 (1-14)</b>                      |            | <b>7 (2-13)</b>              |             | <b>0.2 (n.a.)</b>       |
| <i>S. pneumoniae</i>                        | 6 / 83             | 7.2        | 4 / 53                               | 7.5        | 2 / 30                       | 6.7         | 0.9 (0.3-3.0)           |
| <i>S. aureus</i>                            | 11 / 83            | 13.3       | 4 / 53                               | 7.5        | 7 / 30                       | 23.3        | 0.04 (1.1-3.5)          |
| <i>H. influenzae</i>                        | 11 / 83            | 13.3       | 6 / 53                               | 11.3       | 5 / 30                       | 16.7        | 0.5 (0.6-2.7)           |
| <i>S. pyogenes</i>                          | 5 / 83             | 6.0        | 5 / 53                               | 9.4        | 0 / 30                       | 0           | 0.08 (n.a.)             |
| Mycoplasma spp.                             | 6 / 83             | 7.2        | 4 / 53                               | 7.5        | 2 / 30                       | 6.7         | 0.9 (0.3-3.0)           |
| <i>P. aeruginosa</i>                        | 14 / 83            | 16.9       | 6 / 53                               | 11.3       | 8 / 30                       | 26.7        | 0.07 (1.0-3.2)          |
| <i>M. tuberculosis</i>                      | 3 / 83             | 3.6        | 3 / 53                               | 5.6        | 0 / 30                       | 0           | 0.2 (n.a.)              |
| <b>Non-airway bacterial<br/>coinfection</b> | <b>341 / 7,375</b> | <b>4.6</b> | <b>314 / 7,152</b>                   | <b>4.4</b> | <b>27 / 223</b>              | <b>12.1</b> | <b>0.0001 (1.9-4.2)</b> |
| <b>Age, median (IQR)</b>                    | <b>2 (0-9)</b>     |            | <b>2 (0-8)</b>                       |            | <b>5.5 (3-7.5)</b>           |             | <b>0.08 (n.a.)</b>      |
| Blood stream infection                      | 34 / 341           | 10.0       | 22 / 314                             | 7.0        | 12 / 27                      | 44.4        | 0.0001 (3.7-14.1)       |
| Bacterial Meningitis                        | 3 / 341            | 0.9        | 2 / 314                              | 0.6        | 1 / 27                       | 3.7         | 0.1 (0.8-22.4)          |
| Bacterial<br>Arthritis/Osteomyelitis        | 4 / 341            | 1.2        | 4 / 314                              | 1.3        | 0 / 27                       | 0           | 0.6 (n.a.)              |

|                                                                |                    |            |                    |            |                    |            |                      |
|----------------------------------------------------------------|--------------------|------------|--------------------|------------|--------------------|------------|----------------------|
| Bacterial Urinary Tract Infection                              | 138 / 341          | 40.5       | 132 / 314          | 42.0       | 6 / 27             | 22.2       | 0.04 (0.2-1.0)       |
| Bacterial Endocarditis                                         | 2 / 341            | 0.6        | 2 / 314            | 0.6        | 0 / 27             | 0          | 0.7 (n.a.)           |
| Bacterial Gastroenteritis                                      | 32 / 341           | 9.4        | 30 / 314           | 9.6        | 2 / 27             | 7.4        | 0.7 (0.2-3.1)        |
| <i>S. aureus</i>                                               | 28 / 341           | 8.2        | 23 / 314           | 7.3        | 5 / 27             | 18.5       | 0.04 (1.0-6.25)      |
| <i>S. pneumoniae</i>                                           | 3 / 341            | 0.9        | 3 / 314            | 1.0        | 0 / 27             | 0          | 0.6 (n.a.)           |
| <i>S. viridans</i>                                             | 2 / 341            | 0.6        | 2 / 314            | 0.6        | 0 / 27             | 0          | 0.7 (n.a.)           |
| <i>S. pyogenes</i>                                             | 10 / 341           | 2.9        | 10 / 314           | 3.2        | 0 / 27             | 0          | 0.3 (n.a.)           |
| <i>S. agalactiae</i>                                           | 5 / 341            | 1.5        | 3 / 314            | 1.0        | 2 / 27             | 7.4        | 0.007 (1.7-16.8)     |
| Enterococcal spp.                                              | 11 / 341           | 3.2        | 10 / 314           | 3.2        | 1 / 27             | 3.7        | 0.9 (0.2-7.8)        |
| <i>H. influenzae</i>                                           | 4 / 341            | 1.2        | 3 / 314            | 1.0        | 1 / 27             | 3.7        | 0.2 (0.6-18.4)       |
| <i>E. coli</i>                                                 | 85 / 341           | 24.9       | 81 / 314           | 25.8       | 4 / 27             | 14.8       | 0.2 (0.2-1.5)        |
| Klebsiella spp.                                                | 20 / 341           | 5.9        | 17 / 314           | 5.4        | 3 / 27             | 11.1       | 0.2 (0.7-6.1)        |
| <b>Non-airway viral coinfection</b>                            | <b>143 / 7,375</b> | <b>2.2</b> | <b>139 / 7,152</b> | <b>1.9</b> | <b>4 / 223</b>     | <b>1.8</b> | <b>0.9 (0.3-2.4)</b> |
| <b>Age, median (IQR)</b>                                       | <b>2 (0-7)</b>     |            | <b>2 (0-7)</b>     |            | <b>5.5 (3-7.5)</b> |            | <b>0.6 (n.a.)</b>    |
| Viral Gastroenteritis (incl. Norovirus, Rotavirus, Adenovirus) | 96 / 143           | 67.1       | 96 / 139           | 69.0       | 0 / 4              | 0          | 0.004 (n.a.)         |

\*Statistical analysis was performed with the Chi-Square-Test for categorical variables and the Mann-Whitney U-Test for continuous variables. n.a.=not applicable

**eTable 4. Specific comorbidities as risk factors for ICU admission (with an occurrence of  $\geq 6$  on ICU) analyzed in a bivariate model. Only symptomatic patients were included (N=6,512 out of 7,375 total).**

|                                  | All     |     | General pediatric ward |     | Intensive care unit |      | RR    | CI             | Chi-Square-Test |
|----------------------------------|---------|-----|------------------------|-----|---------------------|------|-------|----------------|-----------------|
|                                  | N=6,512 |     | N=6,290                |     | N=222               |      |       |                | p-value         |
|                                  | N       | %   | N                      | %   | N                   | %    |       |                |                 |
| Asthma                           | 107     | 1.6 | 101                    | 1.6 | 6                   | 2.7  | 1.66  | (0.76 – 3.66)  | 0.21            |
| Recurrent obstructive bronchitis | 52      | 0.8 | 41                     | 0.7 | 11                  | 5.0  | 6.48  | (3.77 – 11.13) | <0.001          |
| Pulmonary hypertension           | 17      | 0.3 | 9                      | 0.1 | 8                   | 3.6  | 14.28 | (8.48 – 24.05) | <0.001          |
| Cyanotic heart disease           | 36      | 0.6 | 27                     | 0.4 | 9                   | 4.1  | 7.60  | (4.25 – 13.59) | <0.001          |
| Acyanotic heart disease          | 107     | 1.6 | 96                     | 1.5 | 11                  | 5.0  | 3.12  | (1.76 – 5.55)  | <0.001          |
| s/p cardiac surgery              | 44      | 0.7 | 36                     | 0.6 | 8                   | 3.6  | 5.50  | (2.90 – 10.43) | <0.001          |
| Arterial hypertension            | 26      | 0.4 | 20                     | 0.3 | 6                   | 2.7  | 6.93  | (3.39 – 14.15) | <0.001          |
| Heart failure                    | 23      | 0.4 | 17                     | 0.3 | 6                   | 2.7  | 7.84  | (3.89 – 15.70) | <0.001          |
| Congenital kidney disease        | 70      | 1.1 | 64                     | 1.0 | 6                   | 2.7  | 2.56  | (1.18 – 5.56)  | 0.002           |
| Epilepsy                         | 175     | 2.7 | 146                    | 2.3 | 29                  | 13.1 | 5.44  | (3.79 – 7.80)  | <0.001          |
| Psychomotor retardation          | 181     | 2.8 | 131                    | 2.1 | 50                  | 22.5 | 10.17 | (7.70 – 13.43) | <0.001          |
| Diabetes mellitus (any type)     | 67      | 1.0 | 60                     | 1.0 | 7                   | 3.2  | 3.13  | (1.53 – 6.39)  | 0.001           |

**eFigure 1. Deaths due to COVID-19 (N = 18)**

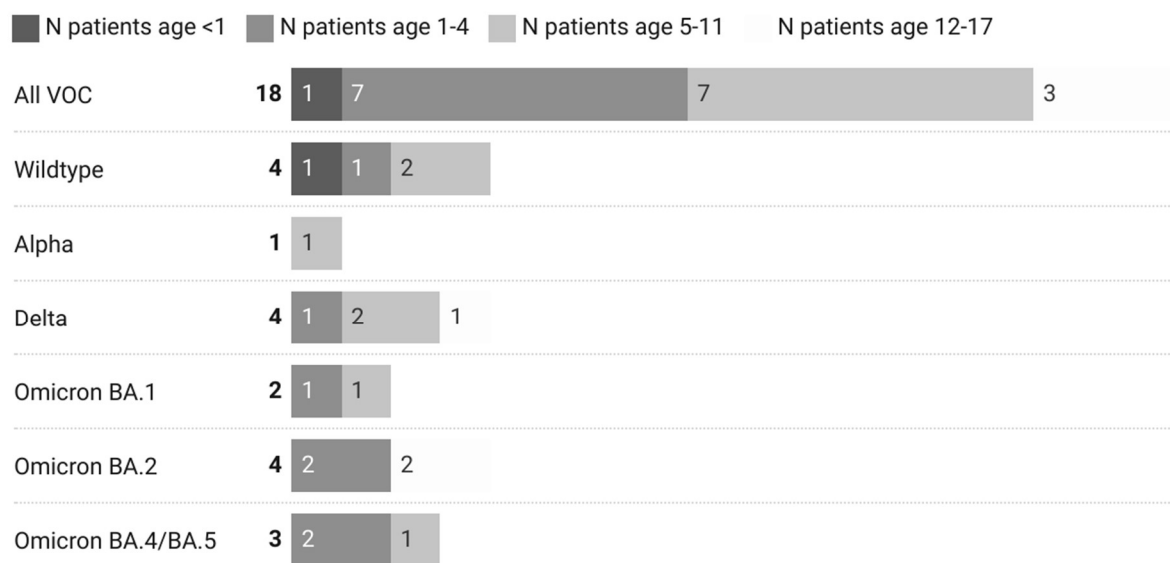

Created with Datawrapper

The relative predominance of different SARS-CoV-2 variants of concern (VOC) in Germany since the beginning of the COVID-19 pandemic has been determined according to VOC data provided by the Robert Koch-Institute (RKI).<sup>1</sup>

<sup>1</sup> Robert Koch-Institut. Besorgniserregende SARS-CoV-2-Virusvarianten (VOC): Anzahl und Anteile von VOC und VOI in Deutschland.

[https://www.rki.de/DE/Content/InfAZ/N/Neuartiges\\_Coronavirus/Virusvariante.html](https://www.rki.de/DE/Content/InfAZ/N/Neuartiges_Coronavirus/Virusvariante.html). Updated September 1, 2022. Accessed September 1, 2022.
